# Supplementary material for: Opposing roles for myeloid and smooth muscle cell STING in pulmonary hypertension
Source: JCI journal article supplement (doi:10.1172/jci.insight.184792), 2025-05-22

# TIMP3 – Full unedited gel for Figure 3

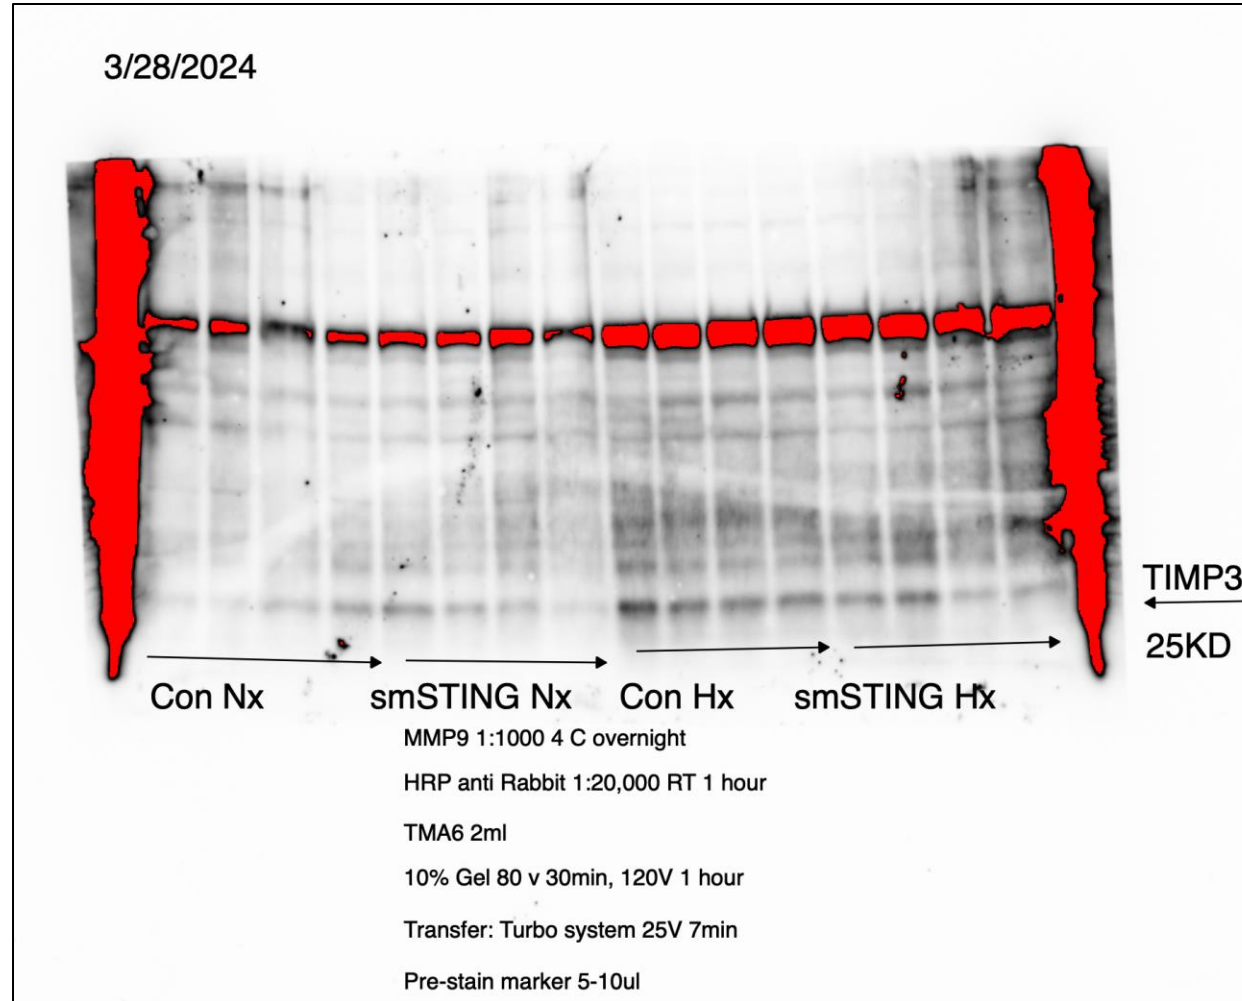

## MMP8 – Full unedited gel for Figure 3

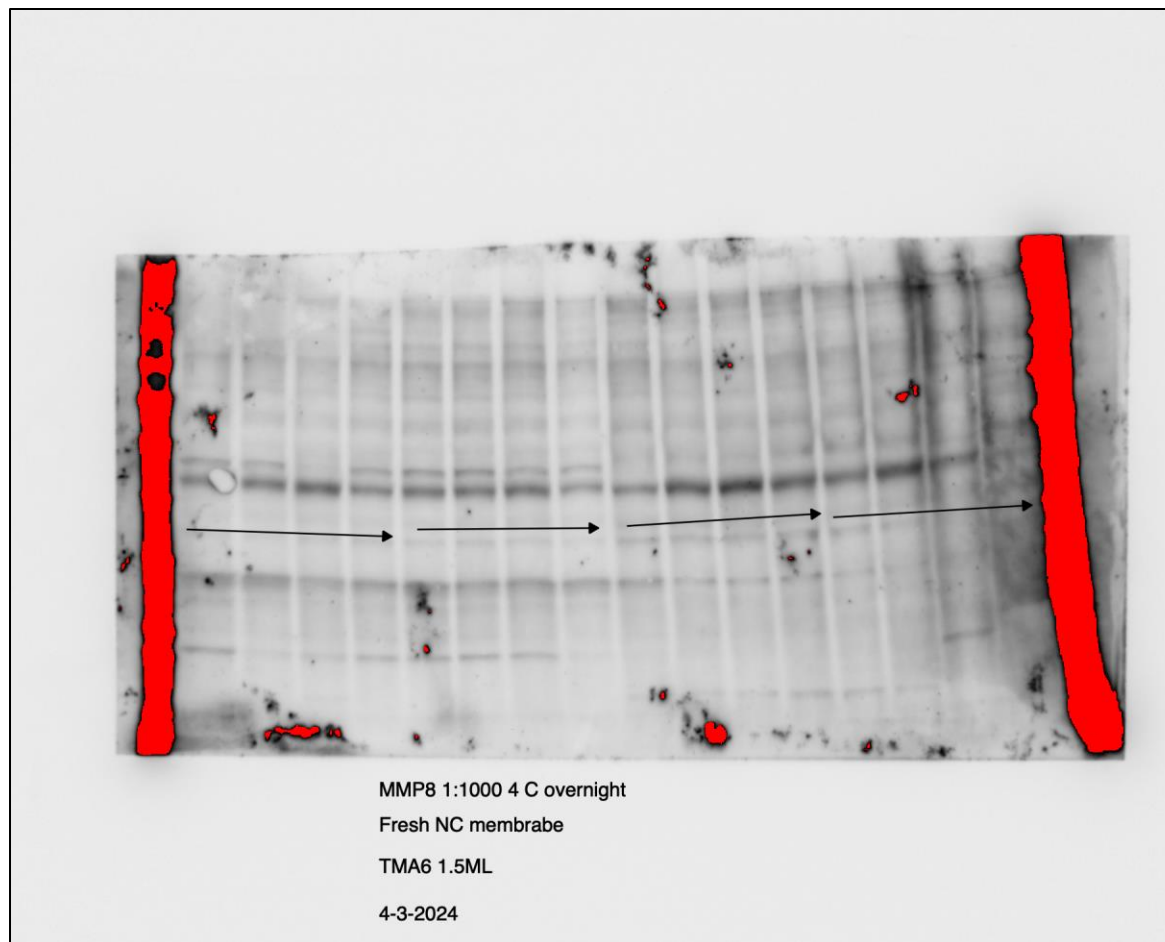

## MMP2 – Full unedited gel for Figure 3

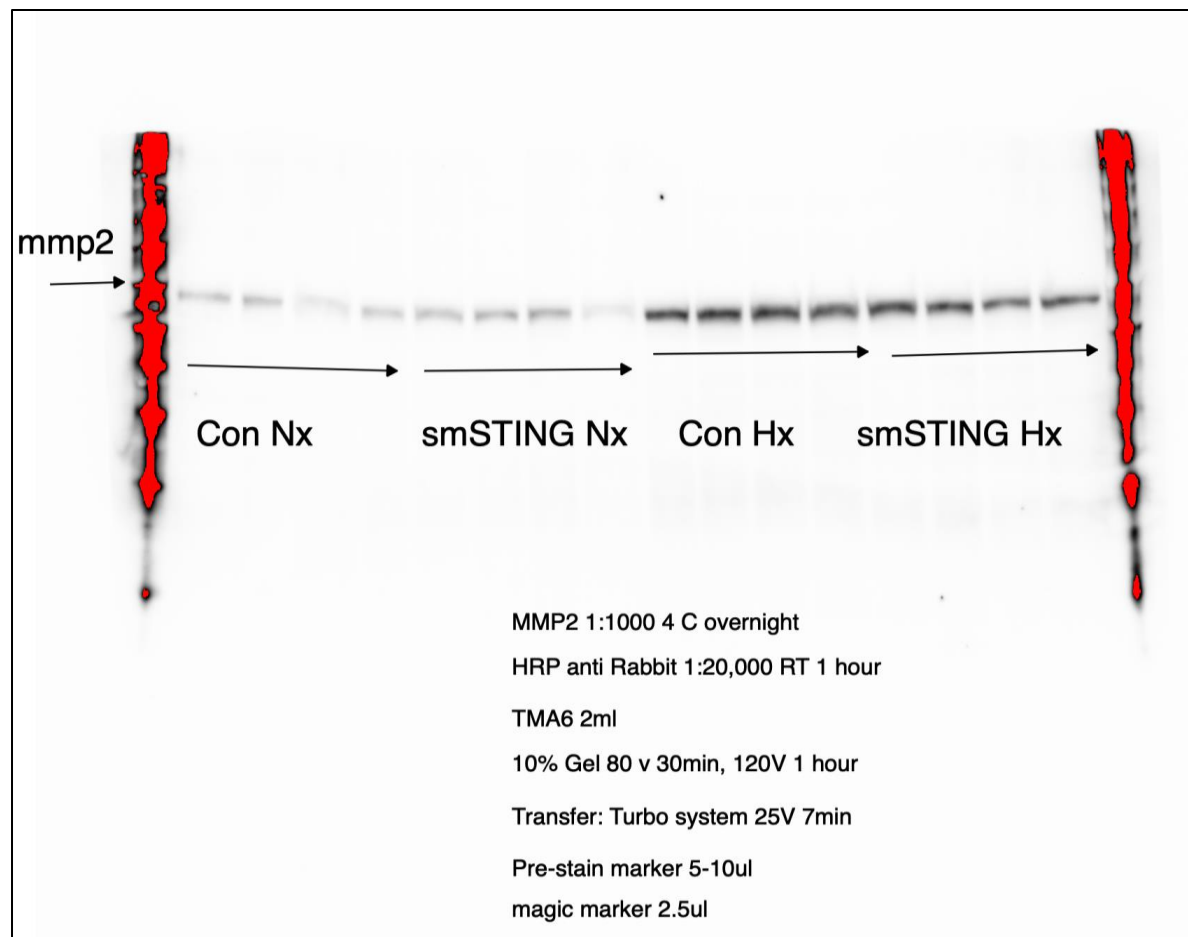

## MMP9 – Full unedited gel for Figure 3

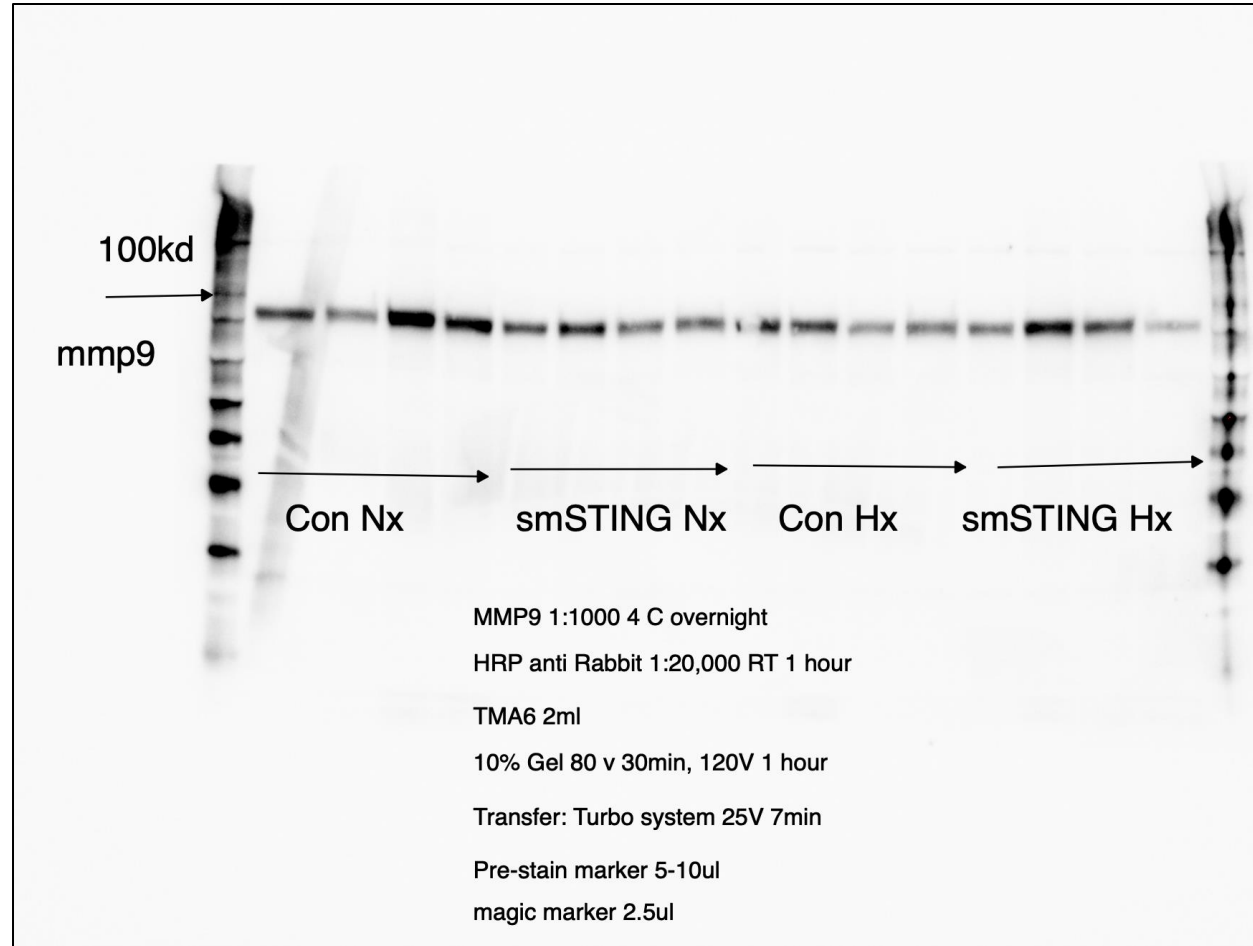

## $\beta$ -Actin – Full unedited gel for Figure 3

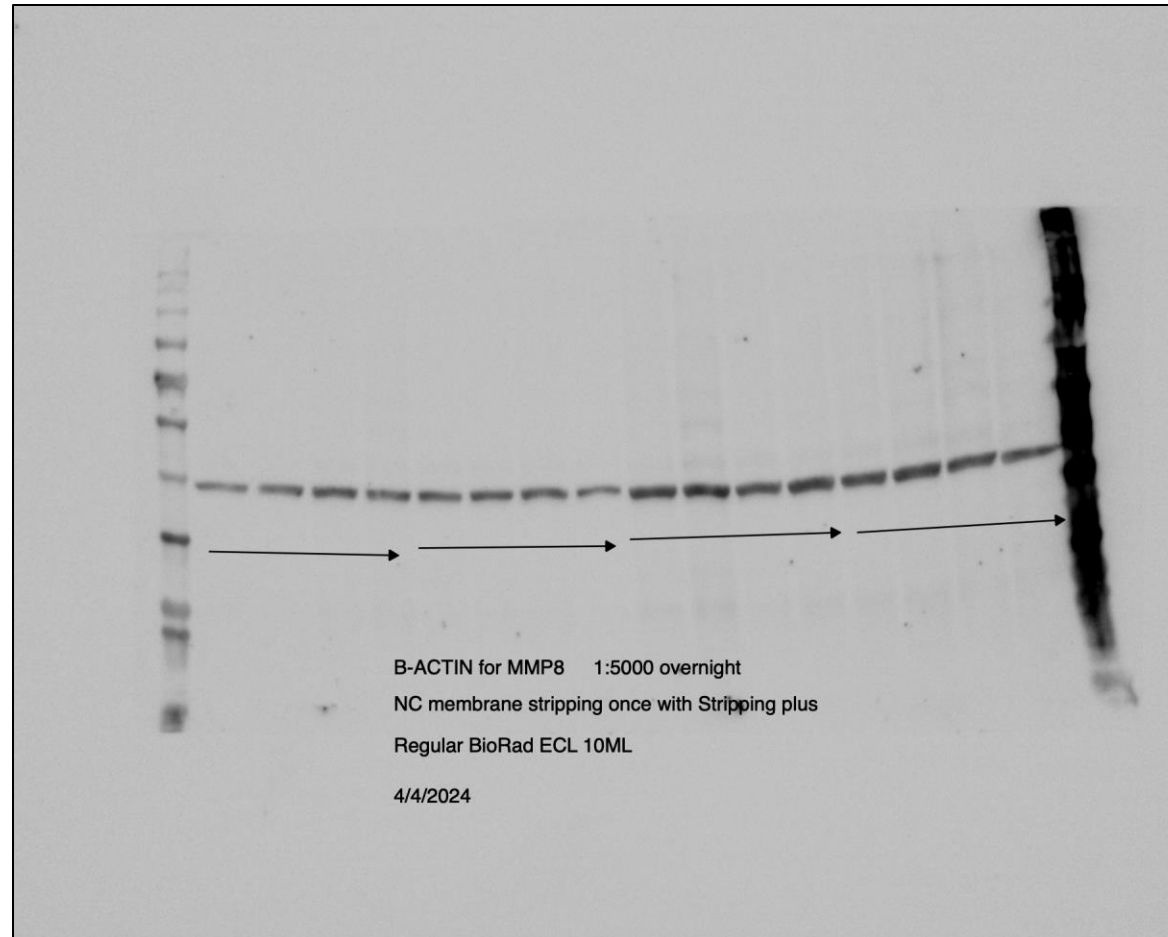

Gel zymogram – Full unedited gel for Figure 3

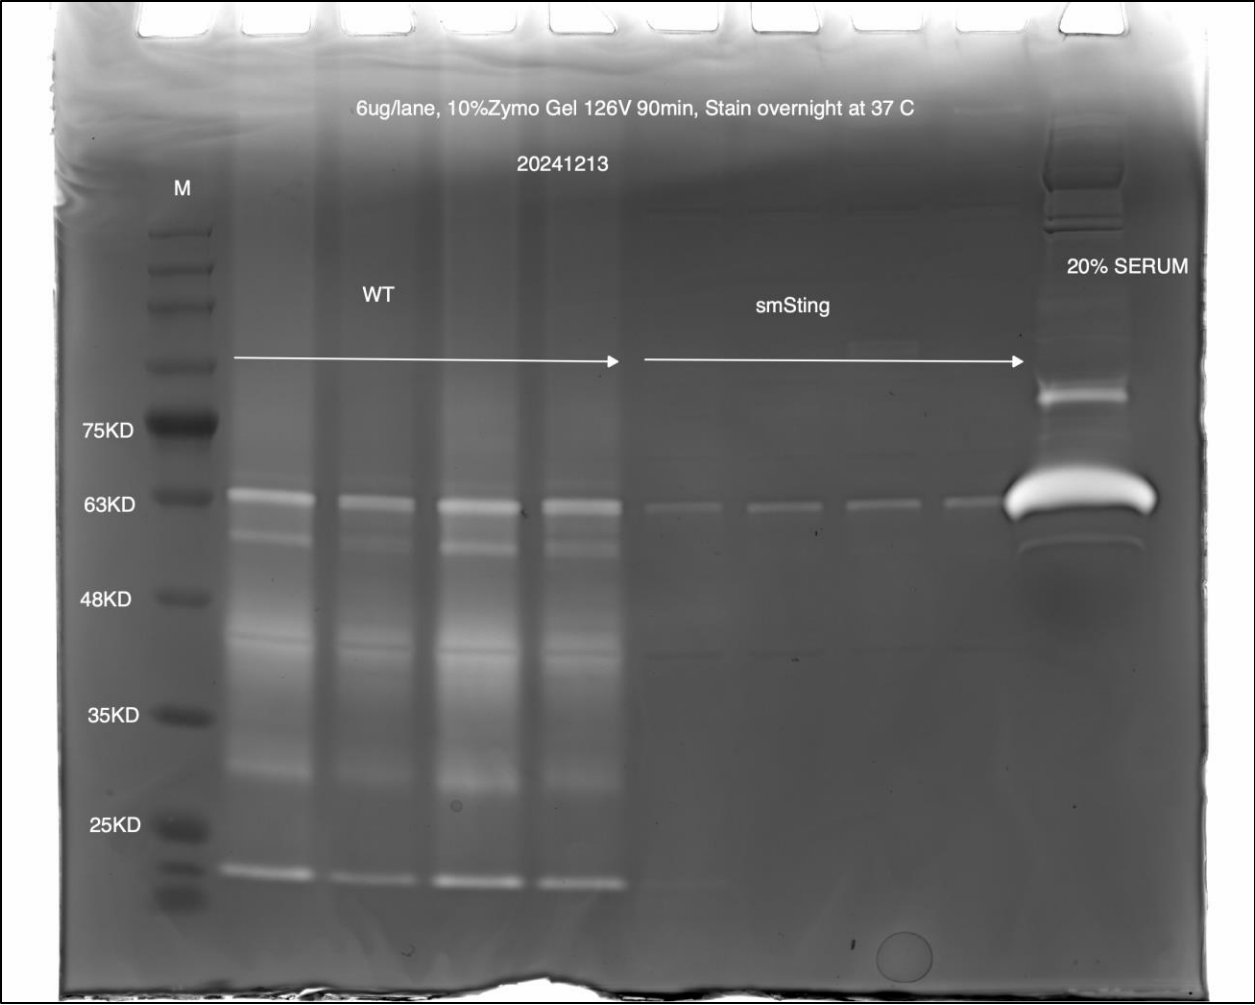

## STING – Full unedited gel for Figure S5

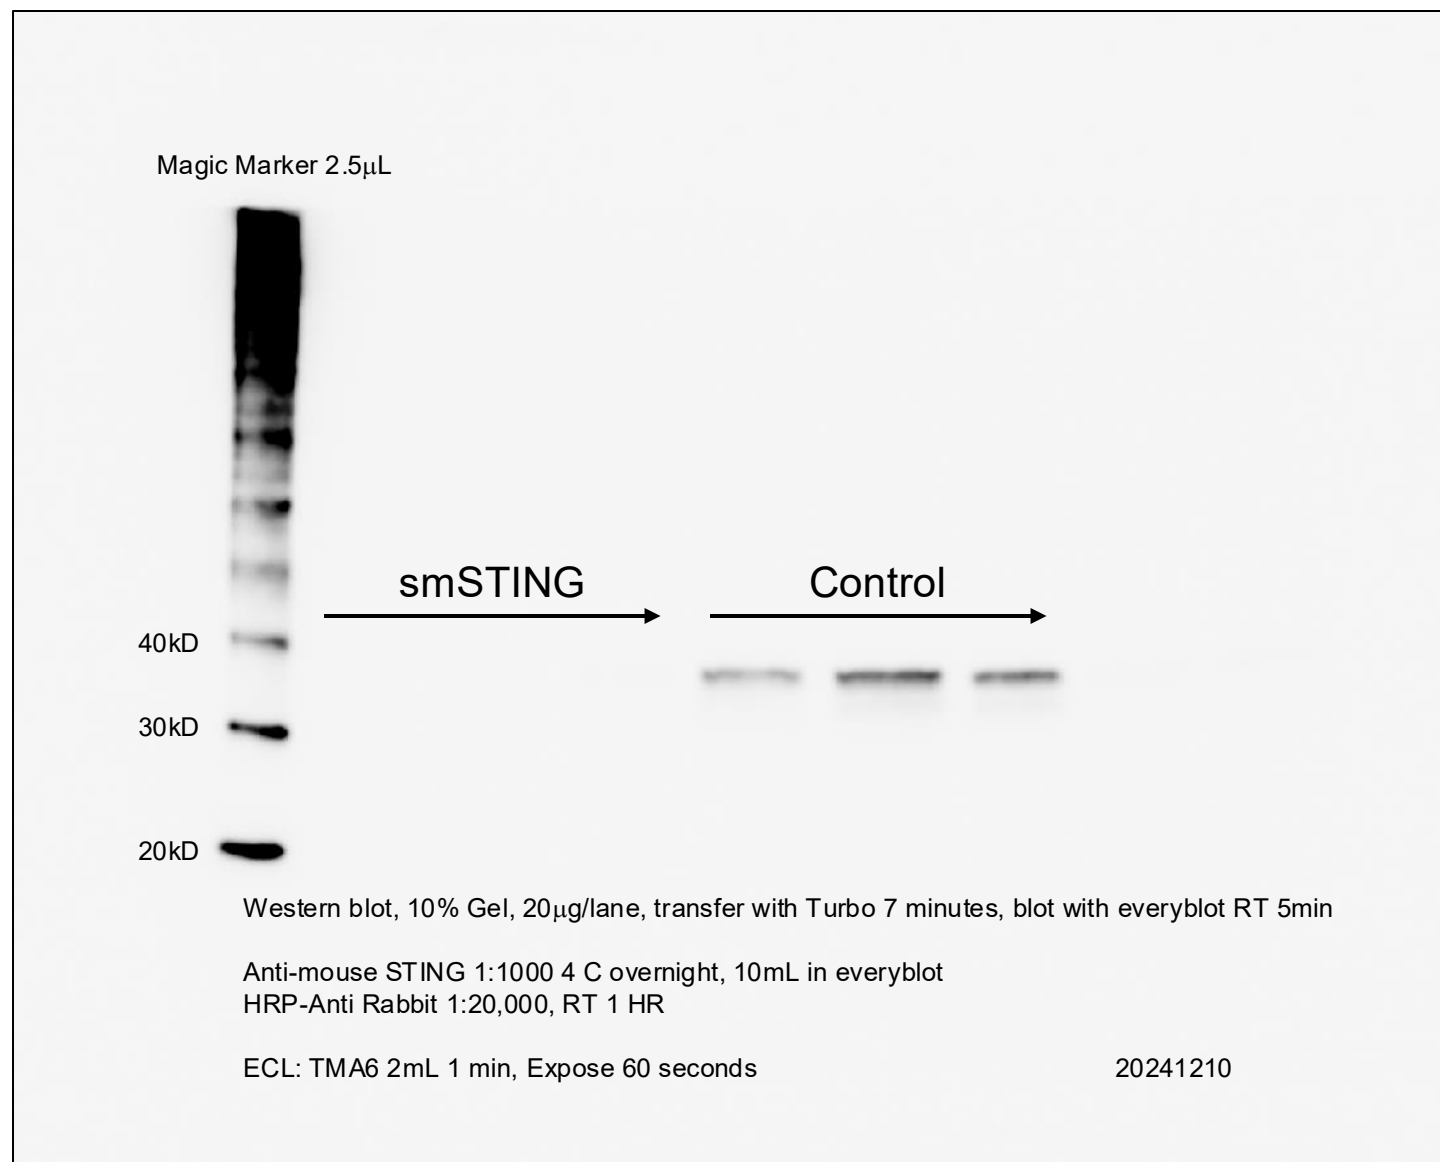

Supplement: sd2 [file 2]
